# Supplementary material
Source: PubMed Central journal article supplement (PMC6065082)
Supplement: ASN.2017121254SupplementaryData1.pdf [file ASN.2017121254SupplementaryData1.pdf]

## Supplemental Material

### Table of Contents

Vitamin D dosing regimen.....1

Table 1 Supp .....2

### Description and safety consideration of the vitamin D dose regimen

#### Vitamin D Dose Regimen

The 600,000 IU single dose regimen for vitamin D supplementation has been employed with excellent safety in clinical trials and in various populations including the extreme elderly (1-3). The largest clinical trial of this regimen was annual dosing for 2 years in 2256 elderly community-based women at risk for fracture demonstrating its long term clinical and laboratory-based safety (2). Short-term laboratory and clinical safety data in youthful subjects at 3, 30, 50 and 90 days post dose are also excellent (3).

#### References

1. Sanders KM, Stuart AL, Williamson EJ, et al. [Annual high-dose oral vitamin D and falls and fractures in older women: a randomized controlled trial.](#) JAMA. 2010; 303(18):1815-22.
2. Heikinheimo RJ, Inkovaara JA, Harju EJ, et al. [Annual injection of vitamin D and fractures of aged bones.](#) Calcif Tissue Int. 199 ;51(2):105-10.

3. Cipriani C, Romagnoli E, Scillitani A, et al. [Effect of a single oral dose of 600,000 IU of cholecalciferol on serum calcitropic hormones in young subjects with vitamin D deficiency: a prospective intervention study.](#) J Clin Endocrinol Metab. 2010 ;95(10):4771-7.

Table 1: Subject characteristics at screening visit

|                                        | High phosphate group | Low phosphate group | significance |
|----------------------------------------|----------------------|---------------------|--------------|
| Age (y)                                | 23.1 ± 3.2           | 23.4 ± 3.4          | ns           |
| Female sex (%)                         | 40                   | 40                  |              |
| BMI                                    | 22.6 ± 3.1           | 23.0 ± 3.4          | ns           |
| Mean systolic 24h ABPM, mm Hg          | 120 ± 7              | 122 ± 8             | ns           |
| Mean diastolic 24 hour ABPM, mm Hg     | 76 ± 7               | 75 ± 8              | ns           |
| Mean 24 hour pulse rate, bpm           | 69 ± 8               | 66 ± 7              | ns           |
| <b>Blood and plasma:</b>               |                      |                     |              |
| Na (mmol/L)                            | 140 ± 3              | 139 ± 4             | ns           |
| K (mmol/L)                             | 4.1 ± 0.4            | 4.2 ± 0.5           | ns           |
| Chloride (mmol/L)                      | 105 ± 5              | 104 ± 6             | ns           |
| Ionized calcium (mmol/L)               | 1.21 ± 0.10          | 1.20 ± 0.11         | ns           |
| Fasting phosphate (mmol/L)             | 1.10 ± 0.21          | 1.14 ± 0.16         | ns           |
| HCO <sub>3</sub> <sup>-</sup> (mmol/L) | 24.5 ± 1.2           | 24.8 ± 1.2          | ns           |
| Creatinine (umol/L)                    | 64 ± 9               | 66 ± 10             | ns           |
| Intact PTH (ng/ml)                     | 39 ± 8               | 40 ± 9              | ns           |
| 25(OH)D (nmol/L)                       | 68 ± 10              | 70 ± 11             | ns           |
| <b>Urine (mmols/24h)</b>               |                      |                     |              |
| Na                                     | 80 ± 15              | 78 ± 12             | ns           |
| K                                      | 61 ± 9               | 58 ± 10             | ns           |
| calcium                                | 3.4 ± 0.8            | 3.2 ± 0.6           | ns           |
| phosphate                              | 23.6 ± 6.1           | 26.1 ± 7.1          | ns           |
| creatinine                             | 7.0 ± 0.5            | 6.8 ± 0.7           | ns           |
| Net acid excretion (meq/24h)           | 34 ± 10              | 29 ± 11             | ns           |
| Albumin (mg/24h)                       | 11 ± 8               | 10 ± 12             | ns           |

Values in table are means ± standard deviation.
